# Supplementary material for: Derivation and validation of a model to predict acute kidney injury following cardiac surgery in patients with normal renal function
Source: PubMed Central journal article supplement (PMC8354173; doi:10.1080/0886022x.2021.1960563), 2021-08-09
Supplement: IRNF_A_1960563_SM7612.pdf [file IRNF_A_1960563_SM7612.pdf]

**Table S1.** Univariate analysis between candidate variables and AKI in training group.

| Variables                              | no-AKI (n=11746) | AKI (n=3955)   | <i>P</i> value |
|----------------------------------------|------------------|----------------|----------------|
| Age, years                             | 45.0 ± 14.2      | 52.7 ± 12.7    | <0.001         |
| Male                                   | 5429 (46.2%)     | 2282 (57.7%)   | <0.001         |
| LVEF                                   |                  |                | <0.001         |
| LVEF >60%                              | 9282 (79.0%)     | 2144 (54.2%)   |                |
| 40% < LVEF ≤ 60%                       | 2305 (19.6%)     | 1546 (39.1%)   |                |
| LVEF ≤ 40%                             | 159 (1.4%)       | 265 (6.7%)     |                |
| Baseline serum creatinine, μmol/L      | 74.9 ± 17.0      | 77.2 ± 17.9    | <0.001         |
| eGFR, ml/min/1.73m <sup>2</sup>        | 95.6 ± 19.3      | 89.9 ± 18.6    | <0.001         |
| Comorbidities                          |                  |                |                |
| Hypertension                           | 1962 (16.7%)     | 1222 (30.9%)   | <0.001         |
| Diabetes mellitus                      | 482 (4.1%)       | 309 (7.8%)     | <0.001         |
| Coronary heart disease                 | 885 (7.5%)       | 619 (15.7%)    | <0.001         |
| COPD                                   | 149 (1.3%)       | 78 (2.0%)      | 0.001          |
| Infectious endocarditis                | 634 (5.4%)       | 214 (5.4%)     | 0.970          |
| Cerebrovascular disease                | 463 (3.9%)       | 223 (5.6%)     | <0.001         |
| Peripheral vascular disease            | 41 (0.3%)        | 24 (0.6%)      | 0.029          |
| Atrial fibrillation                    | 2883 (24.5%)     | 1190 (30.1%)   | <0.001         |
| PCI history                            | 100 (0.9%)       | 59 (1.5%)      | <0.001         |
| Previous cardiac surgery               | 311 (2.6%)       | 143 (3.6%)     | 0.002          |
| History of transfusion                 | 24 (0.2%)        | 11 (0.3%)      | 0.390          |
| Recent contrast media exposure         | 2443 (20.8%)     | 1100 (27.8%)   | <0.001         |
| Preoperative drugs use                 |                  |                |                |
| Renin-angiotensin system inhibitors    | 3437 (29.3%)     | 1824 (46.1%)   | <0.001         |
| NSAID                                  | 1434 (12.2%)     | 768 (19.4%)    | <0.001         |
| Aminoglycoside antibiotics             | 666 (5.7%)       | 245 (6.2%)     | 0.220          |
| Stain                                  | 1226 (10.4%)     | 719 (18.2%)    | <0.001         |
| Proton pump inhibitors                 | 4795 (40.8%)     | 1663 (42.0%)   | 0.180          |
| Erythrocyte transfusion, U             | 0.0 (0.0, 0.0)   | 0.0 (0.0, 0.0) | 0.002          |
| Procedure                              |                  |                | <0.001         |
| CABG                                   | 460 (3.9%)       | 269 (6.8%)     |                |
| Valve                                  | 7217 (61.4%)     | 2573 (65.1%)   |                |
| Aortic                                 | 661 (5.6%)       | 450 (11.4%)    |                |
| CHD                                    | 2998 (25.5%)     | 393 (9.9%)     |                |
| CABG + valve                           | 217 (1.8%)       | 239 (6.0%)     |                |
| Others                                 | 193 (1.6%)       | 31 (0.8%)      |                |
| Laboratory Findings                    |                  |                |                |
| Hemoglobin, g/L                        | 135.7 ± 17.6     | 129.6 ± 18.2   | <0.001         |
| Platelet <100×10 <sup>9</sup> /L       | 291 (2.5%)       | 140 (3.5%)     | <0.001         |
| Blood leucocytes (×10 <sup>9</sup> /L) | 7.1 ± 2.6        | 7.3 ± 2.6      | <0.001         |
| Natremia <135 mmol/L                   | 664 (5.7%)       | 321 (8.1%)     | <0.001         |

|                                         |                   |                   |        |
|-----------------------------------------|-------------------|-------------------|--------|
| Potassium < 3.5mmol/L                   | 1781 (15.2%)      | 737 (18.6%)       | <0.001 |
| Hypomagnesemia                          | 2381 (20.3%)      | 1014 (25.6%)      | <0.001 |
| Alanine aminotransferase > 40 U/L       | 1295 (11.0%)      | 531 (13.4%)       | <0.001 |
| Uric acid, $\mu\text{mol/L}$            | $383.6 \pm 102.6$ | $409.5 \pm 110.7$ | <0.001 |
| Albumin, g/L                            | $38.1 \pm 3.8$    | $37.2 \pm 3.9$    | <0.001 |
| International Normalized Ratio >1.5     | 1132 (9.6%)       | 481 (12.2%)       | <0.001 |
| Low density lipoprotein, mmol/L         | $3.0 \pm 0.8$     | $2.9 \pm 0.8$     | <0.001 |
| Total bilirubin >17.3 $\mu\text{mol/L}$ | 5674 (48.3%)      | 1935 (48.9%)      | 0.500  |

CABG: coronary artery bypass grafting; CHD: congenital heart disease; COPD: chronic obstructive pulmonary disease; eGFR: estimated glomerular filtration rate; LVEF: left ventricular ejection fraction; NSAID: non-steroidal anti-inflammatory drugs; PCI: percutaneous coronary intervention.
